# Supplementary material for: Hidden Hybridization and Habitat Differentiation in a Mediterranean Macrophyte, the Euryhaline Genus Ruppia
Source: Front Plant Sci. 2020 Jul 10;11:830. doi: 10.3389/fpls.2020.00830 (PMC7366321; doi:10.3389/fpls.2020.00830)
Supplement: MATERIAL S1 — Allele frequencies of each microsatellite, calculated for each population. [file Table_1.XLSX]

## Sheet: Spagedi RS
SPAGeDi 1.3a - a program for Spatial Pattern Analysis of Genetic Diversity
Written by Olivier Hardy & Xavier Vekemans
Contributions by Reed Cartwright
Input file : "/Users/Lise/Desktop/RS_mv5_kopie.txt"
Results file : "/Users/Lise/Desktop/out.txt"
271 individuals
12 categories: CAM2_RC, CAM7_RC, CAM8_RC, CAM9_RC, CAM10_RC, CAM11_RC, CAM12_RC, CAM14_RC, CAM15_RC, CAM16_RC, CAM22_RC, CAM23_RC
0 spatial coordinates
13 loci: RMB5, RM26, RM12, RCS9, RUMR4, RMB15, RMB53, RM3, RCS5, RM27, RCS8, RC3, RM22
3 digits per allele
Max ploidy announced: 4
# indiv within each ploidy: 4x=271
# groups (min - max # indiv per group):
12 categorical groups (10 - 31)
1 spatial groups
0 spatio-categorical groups
ALLELE FREQUENCIES
Locus	# missing genotypes (%)	# incomplete genotypes (%)	# of defined genes	# alleles	He (gene diversity corrected for sample size, Nei 1978)
All categories confounded (271 individuals)
RMB5	186 (68.6%)	19 (7.0%)	305	10	0.6199		allele	155	157	159	163	165	167	169	171	173	177
							frequency	0.0117647	0.0235294	0.0235294	0.0235294	0.585294	0.120588	0.146078	0.0392157	0.0117647	0.0147059
RM26	8 (3.0%)	172 (63.5%)	726	14	0.8845		allele	186	188	190	191	192	193	194	195	196	197	199	200	201	203
							frequency	0.154309	0.231622	0.0684411	0.0671736	0.0830165	0.0643219	0.0462611	0.0865019	0.0392902	0.0636882	0.0278834	0.0541825	0.0114068	0.00190114
RM12	9 (3.3%)	220 (81.2%)	715	8	0.7094		allele	211	213	215	217	219	221	223	225
							frequency	0.00540712	0.241094	0.147265	0.0305344	0.451972	0.072201	0.028626	0.0229008
RCS9	2 (0.7%)	197 (72.7%)	689	8	0.7232		allele	96	99	102	105	108	111	114	117
							frequency	0.0315985	0.136307	0.389095	0.315366	0.0662949	0.0551425	0.00433705	0.00185874
RUMR4	15 (5.5%)	199 (73.4%)	626	2	0.4997		allele	124	126
							frequency	0.523438	0.476562
RMB15	3 (1.1%)	185 (68.3%)	741	11	0.7628		allele	161	163	165	167	169	171	173	175	177	179	181
							frequency	0.0217662	0.00310945	0.426617	0.162313	0.120958	0.0867538	0.0404229	0.0541045	0.033893	0.0363806	0.0136816
RMB53	254 (93.7%)	8 (3.0%)	53	3	0.4743		allele	202	204	208
							frequency	0.696078	0.196078	0.107843
RM3	19 (7.0%)	129 (47.6%)	753	10	0.5353		allele	217	223	225	227	229	231	233	235	237	241
							frequency	0.00198413	0.00958995	0.000992064	0.00462963	0.111111	0.633267	0.227844	0.00529101	0.00198413	0.00330688
RCS5	11 (4.1%)	180 (66.4%)	698	8	0.7343		allele	99	103	105	107	109	111	113	115
							frequency	0.00192308	0.229487	0.0375	0.253526	0.377885	0.0721154	0.0108974	0.0166667
RM27	2 (0.7%)	267 (98.5%)	548	7	0.5156		allele	155	158	161	172	174	175	177
							frequency	0.494424	0.00247831	0.00557621	0.490706	0.00123916	0.00185874	0.00371747
RCS8	4 (1.5%)	168 (62.0%)	741	8	0.6008		allele	93	97	101	105	107	109	113	117
							frequency	0.0124844	0.00374532	0.0268414	0.526841	0.00374532	0.338327	0.0842697	0.00374532
RC3	13 (4.8%)	199 (73.4%)	639	17	0.8577		allele	172	174	176	178	180	182	184	186	188	190	192	193	195	197	199	205	207
							frequency	0.0361757	0.0645995	0.0581395	0.0135659	0.102067	0.310401	0.106589	0.0478036	0.0384367	0.0400517	0.00193798	0.0355297	0.0135659	0.00968992	0.00387597	0.0949612	0.0226098
RM22	12 (4.4%)	138 (50.9%)	763	17	0.6671		allele	259	260	261	262	263	264	265	266	267	268	269	270	271	272	273	274	275
							frequency	0.562741	0.023166	0.0366795	0.0376448	0.0125483	0.042471	0.00675676	0.0752896	0.0250965	0.0434363	0.0135135	0.0395753	0.023166	0.0109395	0.0328185	0.001287	0.01287
Category CAM2_RC (11 individuals)
RMB5	11 (100.0%)	0 (0.0%)	0
RM26	0 (0.0%)	7 (63.6%)	32	6	0.7512		allele	186	188	190	191	192	193	194	195	196	197	199	200	201	203
							frequency	0	0.340909	0	0	0.0606061	0	0.0530303	0.0454545	0.356061	0	0	0.143939	0	0
RM12	0 (0.0%)	6 (54.5%)	34	6	0.5707		allele	211	213	215	217	219	221	223	225
							frequency	0.0227273	0	0.128788	0.0757576	0.643939	0.0530303	0.0757576	0
RCS9	0 (0.0%)	9 (81.8%)	27	4	0.7266		allele	96	99	102	105	108	111	114	117
							frequency	0	0.227273	0.439394	0.166667	0.166667	0	0	0
RUMR4	0 (0.0%)	10 (90.9%)	24	2	0.5174		allele	124	126
							frequency	0.545455	0.454545
RMB15	0 (0.0%)	10 (90.9%)	28	6	0.7333		allele	161	163	165	167	169	171	173	175	177	179	181
							frequency	0.0606061	0	0.363636	0	0.030303	0.363636	0.151515	0	0	0.030303	0
RMB53	8 (72.7%)	1 (9.1%)	10	2	0.3086		allele	202	204	208
							frequency	0.833333	0.166667	0
RM3	3 (27.3%)	4 (36.4%)	24	2	0.4891		allele	217	223	225	227	229	231	233	235	237	241
							frequency	0	0	0	0	0.375	0.625	0	0	0	0
RCS5	1 (9.1%)	8 (72.7%)	28	4	0.7415		allele	99	103	105	107	109	111	113	115
							frequency	0	0.383333	0.2	0.283333	0.133333	0	0	0
RM27	1 (9.1%)	10 (90.9%)	20	2	0.5263		allele	155	158	161	172	174	175	177
							frequency	0.5	0	0	0.5	0	0	0
RCS8	0 (0.0%)	7 (63.6%)	30	4	0.5343		allele	93	97	101	105	107	109	113	117
							frequency	0	0	0.0454545	0.272727	0	0.636364	0.0454545	0
RC3	2 (18.2%)	8 (72.7%)	21	5	0.7864		allele	172	174	176	178	180	182	184	186	188	190	192	193	195	197	199	205	207
							frequency	0	0.314815	0	0	0.314815	0.0555556	0	0	0	0	0	0.148148	0	0	0	0.166667	0
RM22	5 (45.5%)	5 (45.5%)	14	5	0.7778		allele	259	260	261	262	263	264	265	266	267	268	269	270	271	272	273	274	275
							frequency	0.166667	0.0833333	0	0	0	0.0833333	0	0.25	0	0	0	0	0	0	0.416667	0	0
Category CAM7_RC (25 individuals)
RMB5	18 (72.0%)	0 (0.0%)	28	1	0		allele	155	157	159	163	165	167	169	171	173	177
							frequency	0	0	0	0	1	0	0	0	0	0
RM26	0 (0.0%)	24 (96.0%)	53	4	0.5406		allele	186	188	190	191	192	193	194	195	196	197	199	200	201	203
							frequency	0.453333	0.02	0	0.513333	0	0	0	0	0	0	0	0.0133333	0	0
RM12	2 (8.0%)	23 (92.0%)	69	4	0.6858		allele	211	213	215	217	219	221	223	225
							frequency	0	0.318841	0.333333	0.0144928	0.333333	0	0	0
RCS9	0 (0.0%)	25 (100.0%)	51	3	0.5421		allele	96	99	102	105	108	111	114	117
							frequency	0	0	0	0.493333	0	0.473333	0.0333333	0
RUMR4	0 (0.0%)	22 (88.0%)	56	2	0.5018		allele	124	126
							frequency	0.56	0.44
RMB15	0 (0.0%)	2 (8.0%)	96	3	0.0784		allele	161	163	165	167	169	171	173	175	177	179	181
							frequency	0	0	0.96	0	0.02	0	0	0.02	0	0	0
RMB53	25 (100.0%)	0 (0.0%)	0
RM3	3 (12.0%)	22 (88.0%)	43	3	0.5341		allele	217	223	225	227	229	231	233	235	237	241
							frequency	0	0	0	0	0.5	0.477273	0.0227273	0	0	0
RCS5	2 (8.0%)	23 (92.0%)	46	3	0.5517		allele	99	103	105	107	109	111	113	115
							frequency	0	0	0	0.0434783	0.5	0.456522	0	0
RM27	0 (0.0%)	25 (100.0%)	50	2	0.5102		allele	155	158	161	172	174	175	177
							frequency	0.5	0	0	0.5	0	0	0
RCS8	0 (0.0%)	25 (100.0%)	50	3	0.5298		allele	93	97	101	105	107	109	113	117
							frequency	0	0	0	0.48	0	0.02	0.5	0
RC3	1 (4.0%)	23 (92.0%)	50	3	0.5288		allele	172	174	176	178	180	182	184	186	188	190	192	193	195	197	199	205	207
							frequency	0	0	0	0	0	0	0.458333	0	0	0	0	0	0.0208333	0	0	0.520833	0
RM22	0 (0.0%)	0 (0.0%)	100	1	0		allele	259	260	261	262	263	264	265	266	267	268	269	270	271	272	273	274	275
							frequency	1	0	0	0	0	0	0	0	0	0	0	0	0	0	0	0	0
Category CAM8_RC (31 individuals)
RMB5	21 (67.7%)	0 (0.0%)	40	2	0.1846		allele	155	157	159	163	165	167	169	171	173	177
							frequency	0	0	0.1	0	0.9	0	0	0	0	0
RM26	0 (0.0%)	22 (71.0%)	80	9	0.8314		allele	186	188	190	191	192	193	194	195	196	197	199	200	201	203
							frequency	0.0645161	0.322581	0.0483871	0.0322581	0.112903	0.16129	0.0806452	0.0322581	0	0.145161	0	0	0	0
RM12	0 (0.0%)	29 (93.5%)	78	7	0.6763		allele	211	213	215	217	219	221	223	225
							frequency	0	0.322581	0.0537634	0.0322581	0.467742	0.0268817	0.0376344	0.0591398
RCS9	0 (0.0%)	20 (64.5%)	85	7	0.7311		allele	96	99	102	105	108	111	114	117
							frequency	0	0.123656	0.387097	0.301075	0.145161	0.016129	0.0107527	0.016129
RUMR4	2 (6.5%)	16 (51.6%)	84	2	0.4043		allele	124	126
							frequency	0.724138	0.275862
RMB15	0 (0.0%)	21 (67.7%)	82	6	0.6721		allele	161	163	165	167	169	171	173	175	177	179	181
							frequency	0	0	0.532258	0.129032	0.112903	0.016129	0.129032	0	0.0806452	0	0
RMB53	31 (100.0%)	0 (0.0%)	0
RM3	0 (0.0%)	12 (38.7%)	100	3	0.3705		allele	217	223	225	227	229	231	233	235	237	241
							frequency	0	0	0	0	0.0483871	0.774194	0.177419	0	0	0
RCS5	1 (3.2%)	21 (67.7%)	78	6	0.7355		allele	99	103	105	107	109	111	113	115
							frequency	0	0.183333	0.0333333	0.266667	0.4	0.0833333	0.0333333	0
RM27	0 (0.0%)	31 (100.0%)	62	2	0.5082		allele	155	158	161	172	174	175	177
							frequency	0.5	0	0	0.5	0	0	0
RCS8	0 (0.0%)	18 (58.1%)	88	3	0.511		allele	93	97	101	105	107	109	113	117
							frequency	0	0	0	0.596774	0	0.370968	0.0322581	0
RC3	0 (0.0%)	24 (77.4%)	76	10	0.8884		allele	172	174	176	178	180	182	184	186	188	190	192	193	195	197	199	205	207
							frequency	0	0.0322581	0.129032	0	0.129032	0.16129	0.0322581	0.0967742	0.145161	0.145161	0	0.0322581	0	0	0	0.0967742	0
RM22	0 (0.0%)	18 (58.1%)	88	9	0.5926		allele	259	260	261	262	263	264	265	266	267	268	269	270	271	272	273	274	275
							frequency	0.612903	0.016129	0	0.0322581	0	0.016129	0	0.16129	0.016129	0.0322581	0	0	0.0967742	0.016129	0	0	0
Category CAM9_RC (16 individuals)
RMB5	14 (87.5%)	0 (0.0%)	8	2	0.5714		allele	155	157	159	163	165	167	169	171	173	177
							frequency	0	0	0	0.5	0	0	0	0	0.5	0
RM26	2 (12.5%)	9 (56.2%)	38	9	0.8672		allele	186	188	190	191	192	193	194	195	196	197	199	200	201	203
							frequency	0.142857	0.285714	0.107143	0.0714286	0.0714286	0.142857	0.0714286	0.0714286	0.0357143	0	0	0	0	0
RM12	1 (6.2%)	10 (62.5%)	44	5	0.575		allele	211	213	215	217	219	221	223	225
							frequency	0.0222222	0.266667	0.0444444	0	0.6	0.0666667	0	0
RCS9	0 (0.0%)	9 (56.2%)	46	3	0.6329		allele	96	99	102	105	108	111	114	117
							frequency	0	0.15625	0.4375	0.40625	0	0	0	0
RUMR4	8 (50.0%)	4 (25.0%)	24	2	0.4891		allele	124	126
							frequency	0.625	0.375
RMB15	0 (0.0%)	14 (87.5%)	36	8	0.7975		allele	161	163	165	167	169	171	173	175	177	179	181
							frequency	0	0	0.34375	0.28125	0.09375	0.09375	0.0625	0.0625	0.03125	0.03125	0
RMB53	16 (100.0%)	0 (0.0%)	0
RM3	1 (6.2%)	8 (50.0%)	44	3	0.4343		allele	217	223	225	227	229	231	233	235	237	241
							frequency	0	0	0	0	0.1	0.733333	0.166667	0	0	0
RCS5	4 (25.0%)	9 (56.2%)	30	4	0.6358		allele	99	103	105	107	109	111	113	115
							frequency	0	0.166667	0	0.25	0.541667	0.0416667	0	0
RM27	0 (0.0%)	16 (100.0%)	35	4	0.5748		allele	155	158	161	172	174	175	177
							frequency	0.46875	0.0416667	0	0.46875	0.0208333	0	0
RCS8	1 (6.2%)	3 (18.8%)	54	4	0.514		allele	93	97	101	105	107	109	113	117
							frequency	0	0	0.0333333	0.666667	0	0.2	0.1	0
RC3	2 (12.5%)	10 (62.5%)	36	7	0.6901		allele	172	174	176	178	180	182	184	186	188	190	192	193	195	197	199	205	207
							frequency	0	0.0714286	0	0	0.142857	0.535714	0.0714286	0	0	0	0	0	0.0714286	0	0	0.0714286	0.0357143
RM22	2 (12.5%)	6 (37.5%)	44	7	0.7335		allele	259	260	261	262	263	264	265	266	267	268	269	270	271	272	273	274	275
							frequency	0.428571	0.0357143	0.285714	0.0714286	0	0.0357143	0	0.0714286	0	0.0714286	0	0	0	0	0	0	0
Category CAM10_RC (30 individuals)
RMB5	21 (70.0%)	1 (3.3%)	34	5	0.7314		allele	155	157	159	163	165	167	169	171	173	177
							frequency	0	0	0	0.111111	0.444444	0.222222	0.166667	0.0555556	0	0
RM26	0 (0.0%)	14 (46.7%)	93	10	0.8269		allele	186	188	190	191	192	193	194	195	196	197	199	200	201	203
							frequency	0.183333	0.344444	0.05	0	0.0833333	0.05	0.0666667	0.0611111	0	0.05	0	0.0777778	0.0333333	0
RM12	0 (0.0%)	22 (73.3%)	84	8	0.7002		allele	211	213	215	217	219	221	223	225
							frequency	0.0166667	0.205556	0.116667	0.0194444	0.488889	0.105556	0.0361111	0.0111111
RCS9	0 (0.0%)	22 (73.3%)	76	5	0.6879		allele	96	99	102	105	108	111	114	117
							frequency	0	0.0666667	0.383333	0.383333	0.15	0.0166667	0	0
RUMR4	1 (3.3%)	29 (96.7%)	58	2	0.5088		allele	124	126
							frequency	0.5	0.5
RMB15	0 (0.0%)	21 (70.0%)	82	8	0.777		allele	161	163	165	167	169	171	173	175	177	179	181
							frequency	0.0222222	0.0277778	0.255556	0.355556	0.144444	0.127778	0	0.0277778	0.0388889	0	0
RMB53	30 (100.0%)	0 (0.0%)	0
RM3	1 (3.3%)	14 (46.7%)	89	7	0.5757		allele	217	223	225	227	229	231	233	235	237	241
							frequency	0	0.0545977	0.00862069	0.0201149	0.0775862	0.614942	0.206897	0	0	0.0172414
RCS5	0 (0.0%)	19 (63.3%)	84	5	0.6961		allele	99	103	105	107	109	111	113	115
							frequency	0	0.222222	0.0388889	0.277778	0.427778	0.0333333	0	0
RM27	0 (0.0%)	30 (100.0%)	60	2	0.5085		allele	155	158	161	172	174	175	177
							frequency	0.5	0	0	0.5	0	0	0
RCS8	0 (0.0%)	16 (53.3%)	88	4	0.5805		allele	93	97	101	105	107	109	113	117
							frequency	0.0166667	0	0	0.483333	0	0.433333	0.0666667	0
RC3	0 (0.0%)	15 (50.0%)	90	10	0.5837		allele	172	174	176	178	180	182	184	186	188	190	192	193	195	197	199	205	207
							frequency	0	0.0666667	0.05	0	0.0333333	0.633333	0.0166667	0	0.0166667	0.0166667	0	0	0	0.0166667	0	0.1	0.05
RM22	0 (0.0%)	23 (76.7%)	74	13	0.8611		allele	259	260	261	262	263	264	265	266	267	268	269	270	271	272	273	274	275
							frequency	0.316667	0	0.0166667	0.0666667	0.0666667	0.1	0.05	0.116667	0.0666667	0.0666667	0.0333333	0.0666667	0	0.0166667	0.0166667	0	0
Category CAM11_RC (10 individuals)
RMB5	4 (40.0%)	2 (20.0%)	21	3	0.3451		allele	155	157	159	163	165	167	169	171	173	177
							frequency	0	0	0	0	0.805556	0	0.138889	0	0	0.0555556
RM26	0 (0.0%)	9 (90.0%)	25	10	0.8791		allele	186	188	190	191	192	193	194	195	196	197	199	200	201	203
							frequency	0.05	0.166667	0	0	0.0666667	0.05	0.0833333	0.1	0	0.0833333	0.3	0	0.05	0.05
RM12	0 (0.0%)	10 (100.0%)	26	5	0.7344		allele	211	213	215	217	219	221	223	225
							frequency	0	0.316667	0.15	0.0333333	0.4	0.1	0	0
RCS9	0 (0.0%)	8 (80.0%)	24	3	0.5791		allele	96	99	102	105	108	111	114	117
							frequency	0	0.15	0.25	0.6	0	0	0	0
RUMR4	0 (0.0%)	10 (100.0%)	20	2	0.5263		allele	124	126
							frequency	0.5	0.5
RMB15	0 (0.0%)	7 (70.0%)	27	7	0.8135		allele	161	163	165	167	169	171	173	175	177	179	181
							frequency	0.05	0	0.383333	0.1	0.133333	0.1	0	0.15	0.0833333	0	0
RMB53	10 (100.0%)	0 (0.0%)	0
RM3	0 (0.0%)	8 (80.0%)	25	5	0.6476		allele	217	223	225	227	229	231	233	235	237	241
							frequency	0	0	0	0	0.1	0.533333	0.283333	0.05	0	0.0333333
RCS5	0 (0.0%)	3 (30.0%)	35	5	0.6949		allele	99	103	105	107	109	111	113	115
							frequency	0	0.133333	0.15	0.183333	0.5	0	0.0333333	0
RM27	0 (0.0%)	10 (100.0%)	20	3	0.5737		allele	155	158	161	172	174	175	177
							frequency	0.45	0	0.05	0.5	0	0	0
RCS8	0 (0.0%)	6 (60.0%)	28	3	0.5548		allele	93	97	101	105	107	109	113	117
							frequency	0	0.05	0	0.4	0	0.55	0	0
RC3	0 (0.0%)	7 (70.0%)	26	7	0.6344		allele	172	174	176	178	180	182	184	186	188	190	192	193	195	197	199	205	207
							frequency	0	0.05	0.05	0.05	0.1	0.6	0	0	0	0	0	0.1	0	0	0	0	0.05
RM22	0 (0.0%)	7 (70.0%)	26	9	0.78		allele	259	260	261	262	263	264	265	266	267	268	269	270	271	272	273	274	275
							frequency	0.45	0.05	0	0.05	0	0.15	0	0.05	0.05	0	0.05	0	0	0.05	0.1	0	0
Category CAM12_RC (30 individuals)
RMB5	13 (43.3%)	4 (13.3%)	60	7	0.7161		allele	155	157	159	163	165	167	169	171	173	177
							frequency	0.0588235	0.0588235	0.0588235	0	0.441176	0.294118	0.0588235	0.0294118	0	0
RM26	4 (13.3%)	7 (23.3%)	90	7	0.7495		allele	186	188	190	191	192	193	194	195	196	197	199	200	201	203
							frequency	0.288462	0.384615	0	0	0.0192308	0.0576923	0	0.115385	0	0	0	0.0961538	0.0384615	0
RM12	1 (3.3%)	25 (83.3%)	77	7	0.7156		allele	211	213	215	217	219	221	223	225
							frequency	0	0.186782	0.304598	0.0172414	0.402299	0.0574713	0.0201149	0.0114943
RCS9	0 (0.0%)	16 (53.3%)	88	4	0.5591		allele	96	99	102	105	108	111	114	117
							frequency	0	0.1	0.616667	0.233333	0	0.05	0	0
RUMR4	1 (3.3%)	27 (90.0%)	62	2	0.5082		allele	124	126
							frequency	0.5	0.5
RMB15	1 (3.3%)	22 (73.3%)	73	7	0.8122		allele	161	163	165	167	169	171	173	175	177	179	181
							frequency	0	0	0.252874	0.114943	0.258621	0.132184	0.0172414	0.189655	0.0344828	0	0
RMB53	29 (96.7%)	0 (0.0%)	4	1	0		allele	202	204	208
							frequency	0	0	1
RM3	2 (6.7%)	4 (13.3%)	105	4	0.1792		allele	217	223	225	227	229	231	233	235	237	241
							frequency	0	0.0297619	0	0.0119048	0.0535714	0.904762	0	0	0	0
RCS5	0 (0.0%)	20 (66.7%)	82	5	0.6858		allele	99	103	105	107	109	111	113	115
							frequency	0.0166667	0.355556	0	0.372222	0.238889	0	0.0166667	0
RM27	0 (0.0%)	30 (100.0%)	60	3	0.5249		allele	155	158	161	172	174	175	177
							frequency	0.483333	0	0.0166667	0.5	0	0	0
RCS8	1 (3.3%)	23 (76.7%)	71	5	0.6967		allele	93	97	101	105	107	109	113	117
							frequency	0	0	0.201149	0.373563	0	0.362069	0.0287356	0.0344828
RC3	2 (6.7%)	20 (66.7%)	72	9	0.7767		allele	172	174	176	178	180	182	184	186	188	190	192	193	195	197	199	205	207
							frequency	0	0.107143	0	0.0892857	0	0.428571	0.0357143	0.107143	0.0357143	0	0	0.0714286	0	0	0	0.0178571	0.107143
RM22	1 (3.3%)	15 (50.0%)	86	7	0.4739		allele	259	260	261	262	263	264	265	266	267	268	269	270	271	272	273	274	275
							frequency	0.715517	0	0.103448	0.00862069	0	0.0517241	0	0	0.0344828	0	0	0	0	0	0.0689655	0	0.0172414
Category CAM14_RC (30 individuals)
RMB5	17 (56.7%)	2 (6.7%)	49	5	0.5185		allele	155	157	159	163	165	167	169	171	173	177
							frequency	0	0	0	0	0.679487	0.0769231	0.115385	0.102564	0	0.025641
RM26	1 (3.3%)	19 (63.3%)	79	11	0.8844		allele	186	188	190	191	192	193	194	195	196	197	199	200	201	203
							frequency	0.114943	0.103448	0.241379	0.0344828	0.12069	0.0804598	0	0.0517241	0.0172414	0.0689655	0.103448	0.0632184	0	0
RM12	0 (0.0%)	23 (76.7%)	84	6	0.693		allele	211	213	215	217	219	221	223	225
							frequency	0	0.216667	0.158333	0.0527778	0.486111	0.0583333	0	0.0277778
RCS9	0 (0.0%)	21 (70.0%)	79	5	0.7189		allele	96	99	102	105	108	111	114	117
							frequency	0.0333333	0.227778	0.394444	0.277778	0.0666667	0	0	0
RUMR4	0 (0.0%)	20 (66.7%)	80	2	0.4973		allele	124	126
							frequency	0.433333	0.566667
RMB15	0 (0.0%)	22 (73.3%)	79	9	0.7652		allele	161	163	165	167	169	171	173	175	177	179	181
							frequency	0.0388889	0	0.444444	0.0944444	0.0972222	0.0916667	0.0277778	0.0833333	0.0194444	0.102778	0
RMB53	30 (100.0%)	0 (0.0%)	0
RM3	2 (6.7%)	17 (56.7%)	78	3	0.5549		allele	217	223	225	227	229	231	233	235	237	241
							frequency	0	0	0	0	0.0714286	0.553571	0.375	0	0	0
RCS5	0 (0.0%)	24 (80.0%)	75	6	0.7839		allele	99	103	105	107	109	111	113	115
							frequency	0	0.222222	0.0638889	0.213889	0.330556	0.0416667	0	0.127778
RM27	0 (0.0%)	30 (100.0%)	60	3	0.5249		allele	155	158	161	172	174	175	177
							frequency	0.483333	0	0.0166667	0.5	0	0	0
RCS8	0 (0.0%)	21 (70.0%)	78	3	0.5802		allele	93	97	101	105	107	109	113	117
							frequency	0	0	0	0.45	0	0.466667	0.0833333	0
RC3	2 (6.7%)	20 (66.7%)	72	12	0.7895		allele	172	174	176	178	180	182	184	186	188	190	192	193	195	197	199	205	207
							frequency	0	0.0178571	0.0357143	0	0.214286	0.383929	0.107143	0.107143	0.00892857	0	0	0.0178571	0.0178571	0.0357143	0.0178571	0.0357143	0
RM22	1 (3.3%)	16 (53.3%)	86	16	0.679		allele	259	260	261	262	263	264	265	266	267	268	269	270	271	272	273	274	275
							frequency	0.557471	0.0258621	0.0172414	0.0172414	0.0258621	0.0172414	0.00862069	0.0517241	0.0172414	0.0603448	0.0172414	0.0574713	0.0517241	0	0.0517241	0.0114943	0.0114943
Category CAM15_RC (29 individuals)
RMB5	29 (100.0%)	0 (0.0%)	0
RM26	0 (0.0%)	14 (48.3%)	88	8	0.853		allele	186	188	190	191	192	193	194	195	196	197	199	200	201	203
							frequency	0.103448	0.172414	0.0603448	0	0.224138	0.0431034	0.155172	0.0603448	0	0.181034	0	0	0	0
RM12	0 (0.0%)	26 (89.7%)	68	6	0.6539		allele	211	213	215	217	219	221	223	225
							frequency	0.0114943	0.241379	0.166667	0.0287356	0.517241	0.0344828	0	0
RCS9	0 (0.0%)	20 (69.0%)	76	5	0.7175		allele	96	99	102	105	108	111	114	117
							frequency	0.0172414	0.137931	0.396552	0.310345	0.137931	0	0	0
RUMR4	1 (3.4%)	14 (48.3%)	84	2	0.4957		allele	124	126
							frequency	0.571429	0.428571
RMB15	0 (0.0%)	18 (62.1%)	81	6	0.6417		allele	161	163	165	167	169	171	173	175	177	179	181
							frequency	0	0	0.477012	0.362069	0.0344828	0.0632184	0.045977	0	0.0172414	0	0
RMB53	29 (100.0%)	0 (0.0%)	0
RM3	0 (0.0%)	14 (48.3%)	88	4	0.3855		allele	217	223	225	227	229	231	233	235	237	241
							frequency	0	0	0	0	0.0172414	0.758621	0.206897	0.0172414	0	0
RCS5	0 (0.0%)	17 (58.6%)	82	5	0.5417		allele	99	103	105	107	109	111	113	115
							frequency	0	0.224138	0.0517241	0.0689655	0.637931	0	0.0172414	0
RM27	0 (0.0%)	28 (96.6%)	60	2	0.5079		allele	155	158	161	172	174	175	177
							frequency	0.517241	0	0	0.482759	0	0	0
RCS8	0 (0.0%)	13 (44.8%)	90	3	0.4659		allele	93	97	101	105	107	109	113	117
							frequency	0	0	0	0.672414	0.0344828	0.293103	0	0
RC3	1 (3.4%)	21 (72.4%)	70	9	0.8663		allele	172	174	176	178	180	182	184	186	188	190	192	193	195	197	199	205	207
							frequency	0	0.0535714	0.214286	0	0.0892857	0.196429	0.0535714	0.0892857	0.0714286	0.178571	0	0.0535714	0	0	0	0	0
RM22	0 (0.0%)	15 (51.7%)	86	7	0.5751		allele	259	260	261	262	263	264	265	266	267	268	269	270	271	272	273	274	275
							frequency	0.62069	0.0172414	0	0.0344828	0	0	0	0.189655	0	0.0862069	0.0172414	0	0.0344828	0	0	0	0
Category CAM16_RC (26 individuals)
RMB5	26 (100.0%)	0 (0.0%)	0
RM26	1 (3.8%)	20 (76.9%)	62	11	0.7887		allele	186	188	190	191	192	193	194	195	196	197	199	200	201	203
							frequency	0.05	0.313333	0.0833333	0.0333333	0.0133333	0.06	0.01	0.32	0.01	0.0933333	0.0133333	0	0	0
RM12	2 (7.7%)	22 (84.6%)	66	7	0.7656		allele	211	213	215	217	219	221	223	225
							frequency	0	0.215278	0.0277778	0.0208333	0.368056	0.229167	0.0902778	0.0486111
RCS9	1 (3.8%)	21 (80.8%)	61	4	0.7312		allele	96	99	102	105	108	111	114	117
							frequency	0.28	0.16	0.38	0.18	0	0	0	0
RUMR4	2 (7.7%)	15 (57.7%)	66	2	0.4363		allele	124	126
							frequency	0.3125	0.6875
RMB15	1 (3.8%)	23 (88.5%)	72	8	0.8046		allele	161	163	165	167	169	171	173	175	177	179	181
							frequency	0	0	0.14	0.0266667	0.32	0.08	0	0.0333333	0.02	0.233333	0.146667
RMB53	26 (100.0%)	0 (0.0%)	0
RM3	0 (0.0%)	8 (30.8%)	89	6	0.4566		allele	217	223	225	227	229	231	233	235	237	241
							frequency	0	0	0	0.00961538	0.00961538	0.253205	0.695513	0.0128205	0.0192308	0
RCS5	1 (3.8%)	13 (50.0%)	75	5	0.5324		allele	99	103	105	107	109	111	113	115
							frequency	0	0.153333	0	0.653333	0.153333	0.02	0	0.02
RM27	0 (0.0%)	25 (96.2%)	54	3	0.5268		allele	155	158	161	172	174	175	177
							frequency	0.519231	0	0	0.461538	0	0.0192308	0
RCS8	1 (3.8%)	12 (46.2%)	76	3	0.3786		allele	93	97	101	105	107	109	113	117
							frequency	0	0	0	0.76	0	0.22	0.02	0
RC3	2 (7.7%)	21 (80.8%)	55	6	0.7409		allele	172	174	176	178	180	182	184	186	188	190	192	193	195	197	199	205	207
							frequency	0.388889	0.0625	0	0	0.0208333	0.201389	0.270833	0	0	0	0	0.0555556	0	0	0	0	0
RM22	1 (3.8%)	18 (69.2%)	65	11	0.7072		allele	259	260	261	262	263	264	265	266	267	268	269	270	271	272	273	274	275
							frequency	0.493333	0.03	0	0.04	0.02	0.02	0	0.02	0	0.06	0.04	0.223333	0	0.0333333	0	0	0.02
Category CAM22_RC (19 individuals)
RMB5	6 (31.6%)	6 (31.6%)	41	5	0.6773		allele	155	157	159	163	165	167	169	171	173	177
							frequency	0	0	0	0	0.314103	0.134615	0.467949	0.0384615	0	0.0448718
RM26	0 (0.0%)	16 (84.2%)	48	11	0.9018		allele	186	188	190	191	192	193	194	195	196	197	199	200	201	203
							frequency	0.0701754	0.166667	0.122807	0.0526316	0.122807	0.0263158	0	0.140351	0.0964912	0	0.0350877	0.140351	0.0263158	0
RM12	0 (0.0%)	14 (73.7%)	53	7	0.7762		allele	211	213	215	217	219	221	223	225
							frequency	0	0.267544	0.109649	0.0614035	0.372807	0.0745614	0.0526316	0.0614035
RCS9	0 (0.0%)	14 (73.7%)	48	3	0.645		allele	96	99	102	105	108	111	114	117
							frequency	0	0.210526	0.473684	0.315789	0	0	0	0
RUMR4	0 (0.0%)	19 (100.0%)	38	2	0.5135		allele	124	126
							frequency	0.5	0.5
RMB15	0 (0.0%)	13 (68.4%)	55	8	0.7292		allele	161	163	165	167	169	171	173	175	177	179	181
							frequency	0.0877193	0	0.482456	0.166667	0.0789474	0.0350877	0.0263158	0.0701754	0.0526316	0	0
RMB53	12 (63.2%)	4 (21.1%)	20	3	0.4619		allele	202	204	208
							frequency	0.714286	0.214286	0.0714286
RM3	4 (21.1%)	11 (57.9%)	38	3	0.5044		allele	217	223	225	227	229	231	233	235	237	241
							frequency	0	0	0	0	0.1	0.666667	0.233333	0	0	0
RCS5	0 (0.0%)	15 (78.9%)	50	5	0.726		allele	99	103	105	107	109	111	113	115
							frequency	0	0.385965	0.0175439	0.184211	0.307018	0.105263	0	0
RM27	0 (0.0%)	19 (100.0%)	40	3	0.5469		allele	155	158	161	172	174	175	177
							frequency	0.482456	0	0	0.482456	0	0	0.0350877
RCS8	0 (0.0%)	14 (73.7%)	53	5	0.6519		allele	93	97	101	105	107	109	113	117
							frequency	0.114035	0.0263158	0	0.464912	0	0.359649	0.0350877	0
RC3	0 (0.0%)	19 (100.0%)	39	12	0.8624		allele	172	174	176	178	180	182	184	186	188	190	192	193	195	197	199	205	207
							frequency	0	0.131579	0.0526316	0	0.210526	0.280702	0.0789474	0.0438596	0.0701754	0	0.0263158	0.0263158	0.0263158	0.0263158	0	0.0263158	0
RM22	1 (5.3%)	8 (42.1%)	56	10	0.8092		allele	259	260	261	262	263	264	265	266	267	268	269	270	271	272	273	274	275
							frequency	0.388889	0.0555556	0	0.138889	0	0.0833333	0	0.0277778	0.0833333	0.0555556	0	0	0.0277778	0	0.0277778	0	0.111111
Category CAM23_RC (14 individuals)
RMB5	6 (42.9%)	4 (28.6%)	24	5	0.6522		allele	155	157	159	163	165	167	169	171	173	177
							frequency	0	0.125	0	0	0.5625	0.0625	0.1875	0.0625	0	0
RM26	0 (0.0%)	11 (78.6%)	38	11	0.8564		allele	186	188	190	191	192	193	194	195	196	197	199	200	201	203
							frequency	0.202381	0.119048	0.0238095	0	0.0238095	0.0595238	0.0357143	0.0357143	0.238095	0.0238095	0.0238095	0.214286	0	0
RM12	3 (21.4%)	10 (71.4%)	32	7	0.7545		allele	211	213	215	217	219	221	223	225
							frequency	0	0.30303	0.0909091	0.030303	0.393939	0.0909091	0.0606061	0.030303
RCS9	1 (7.1%)	12 (85.7%)	28	5	0.6934		allele	96	99	102	105	108	111	114	117
							frequency	0	0.192308	0.5	0.192308	0.0769231	0.0384615	0	0
RUMR4	0 (0.0%)	13 (92.9%)	30	2	0.5067		allele	124	126
							frequency	0.571429	0.428571
RMB15	1 (7.1%)	12 (85.7%)	30	7	0.7604		allele	161	163	165	167	169	171	173	175	177	179	181
							frequency	0.0897436	0	0.435897	0.217949	0	0.102564	0.0769231	0.0384615	0.0384615	0	0
RMB53	8 (57.1%)	3 (21.4%)	19	3	0.4496		allele	202	204	208
							frequency	0.722222	0.222222	0.0555556
RM3	3 (21.4%)	7 (50.0%)	30	4	0.6027		allele	217	223	225	227	229	231	233	235	237	241
							frequency	0.0454545	0	0	0	0.181818	0.590909	0.181818	0	0	0
RCS5	2 (14.3%)	8 (57.1%)	33	6	0.7018		allele	99	103	105	107	109	111	113	115
							frequency	0	0.444444	0.0277778	0.125	0.319444	0.0416667	0.0416667	0
RM27	1 (7.1%)	13 (92.9%)	27	3	0.5448		allele	155	158	161	172	174	175	177
							frequency	0.487179	0	0	0.487179	0	0	0.025641
RCS8	1 (7.1%)	10 (71.4%)	35	5	0.6027		allele	93	97	101	105	107	109	113	117
							frequency	0.0512821	0	0.025641	0.538462	0	0.346154	0.0384615	0
RC3	1 (7.1%)	11 (78.6%)	32	13	0.8772		allele	172	174	176	178	180	182	184	186	188	190	192	193	195	197	199	205	207
							frequency	0	0.025641	0.0769231	0.0384615	0.192308	0.282051	0.0384615	0	0.025641	0.025641	0	0	0.0769231	0.0384615	0.0384615	0.115385	0.025641
RM22	1 (7.1%)	7 (50.0%)	38	9	0.7323		allele	259	260	261	262	263	264	265	266	267	268	269	270	271	272	273	274	275
							frequency	0.5	0.0769231	0.115385	0	0	0.0769231	0	0	0.0384615	0.0384615	0	0.0769231	0	0.0384615	0.0384615	0	0

## Sheet: Allele freqs R. spiralis
GenoDive 3.03
Allele Frequencies and Allele Counts R. spiralis
total number of alleles for each locus
RMB5	10
RM26	14
RM12	9
RCS9	8
RUMR4	3
RMB15	11
RMB53	3
RM3	9
RCS5	8
RM27	7
RCS8	8
RC3	17
RM22	17
Total: 125
Allele frequencies per locus and per population:
Maximum likelihood method was used to correct for the unknown dosage of the alleles.
RMB5:
Population	%missing genotypes	155	157	159	163	165	167	169	171	173	177
T4	1	0	0	0	0	0	0	0	0	0	0
P6	0.72	0	0	0	0	1	0	0	0	0	0
D6	0.677	0	0	0.1	0	0.9	0	0	0	0	0
P2	0.875	0	0	0	0.5	0	0	0	0	0.5	0
P3	0.717	0	0	0	0.111	0.444	0.222	0.187	0.035	0	0
P4	0.475	0	0	0	0	0.863	0	0.094	0	0	0.043
P1	0.5	0.059	0.059	0.059	0	0.452	0.297	0.059	0.016	0	0
D7	0.592	0	0	0	0	0.705	0.077	0.1	0.099	0	0.02
P6	1	0	0	0	0	0	0	0	0	0	0
P7	1	0	0	0	0	0	0	0	0	0	0
P8	0.461	0	0	0	0	0.34	0.095	0.505	0.021	0	0.039
P9	0.571	0	0.125	0	0	0.631	0.034	0.168	0.042	0	0
Overall	0.719	0.013	0.026	0.026	0.026	0.613	0.108	0.131	0.03	0.013	0.013
RM26:
Population	%missing genotypes	186	188	190	191	192	193	194	195	196	197	199	200	201	203
T4	0	0	0.356	0	0	0.051	0	0.049	0.026	0.373	0	0	0.146	0	0
P6	0	0.417	0.01	0	0.563	0	0	0	0	0	0	0	0.01	0	0
D6	0	0.069	0.371	0.053	0.024	0.088	0.15	0.07	0.026	0	0.149	0	0	0	0
P2	0.122	0.19	0.332	0.074	0.048	0.071	0.145	0.071	0.047	0.021	0	0	0	0	0
P3	0	0.206	0.384	0.03	0	0.084	0.051	0.053	0.047	0	0.041	0	0.069	0.033	0
P4	0	0.028	0.189	0	0	0.055	0.028	0.078	0.076	0	0.079	0.367	0	0.05	0.05
P1	0.133	0.291	0.42	0	0	0.01	0.05	0	0.115	0	0	0	0.076	0.038	0
D7	0.033	0.115	0.109	0.276	0.035	0.122	0.072	0	0.032	0.01	0.065	0.105	0.06	0	0
P6	0	0.1	0.177	0.054	0	0.237	0.032	0.153	0.058	0	0.19	0	0	0	0
P7	0.038	0.039	0.346	0.071	0.027	0.011	0.041	0.011	0.345	0.01	0.087	0.011	0	0	0
P8	0	0.06	0.198	0.112	0.037	0.141	0.016	0	0.151	0.098	0	0.031	0.142	0.016	0
P9	0	0.211	0.142	0.019	0	0.019	0.046	0.022	0.02	0.254	0.019	0.019	0.229	0	0
Overall	0.03	0.139	0.244	0.066	0.055	0.091	0.065	0.052	0.081	0.037	0.062	0.029	0.063	0.014	0.001
RM12:
Population	%missing genotypes	211	213	215	217	219	221	223	225	227
T4	0	0.023	0	0.11	0.055	0.711	0.052	0.049	0	0
P6	0.08	0	0.315	0.337	0.011	0.337	0	0	0	0
D6	0	0	0.277	0.043	0.025	0.57	0.017	0.025	0.043	0
P2	0.062	0.018	0.212	0.035	0	0.68	0.055	0	0	0
P3	0	0.009	0.163	0.085	0.017	0.603	0.09	0.026	0.008	0
P4	0	0	0.3	0.12	0.026	0.471	0.083	0	0	0
P1	0.033	0	0.157	0.281	0.017	0.474	0.045	0.018	0.009	0
D7	0	0	0.177	0.125	0.036	0.592	0.044	0	0.025	0
P6	0	0.009	0.178	0.105	0.018	0.646	0.028	0	0.009	0.009
P7	0.077	0	0.199	0.022	0.011	0.434	0.215	0.059	0.058	0
P8	0	0	0.26	0.087	0.057	0.438	0.071	0.03	0.056	0
P9	0.214	0	0.31	0.075	0.024	0.442	0.077	0.049	0.023	0
Overall	0.033	0.006	0.227	0.145	0.032	0.455	0.078	0.026	0.029	0.001
RCS9:
Population	%missing genotypes	96	99	102	105	108	111	114	117
T4	0	0	0.198	0.501	0.135	0.166	0	0	0
P6	0	0	0	0	0.522	0	0.457	0.021	0
D6	0	0	0.102	0.42	0.32	0.132	0.008	0.008	0.009
P2	0	0	0.128	0.438	0.434	0	0	0	0
P3	0	0	0.038	0.425	0.415	0.113	0.009	0	0
P4	0	0	0.088	0.163	0.749	0	0	0	0
P1	0	0	0.071	0.693	0.204	0	0.032	0	0
D7	0	0.018	0.218	0.442	0.28	0.041	0	0	0
P6	0	0.01	0.116	0.451	0.326	0.097	0	0	0
P7	0.038	0.276	0.153	0.416	0.156	0	0	0	0
P8	0	0	0.167	0.523	0.309	0	0	0	0
P9	0.071	0	0.121	0.659	0.151	0.049	0.02	0	0
Overall	0.007	0.026	0.122	0.434	0.311	0.058	0.044	0.004	0.001
RUMR4:
Population	%missing genotypes	124	126	128
T4	0	0.593	0.407	0
P6	0	0.62	0.38	0
D6	0.065	0.819	0.181	0
P2	0.5	0.674	0.326	0
P3	0.033	0.5	0.5	0
P4	0	0.5	0.5	0
P1	0.033	0.5	0.5	0
D7	0	0.393	0.607	0
P6	0.034	0.611	0.38	0.009
P7	0.077	0.217	0.783	0
P8	0	0.5	0.5	0
P9	0	0.639	0.361	0
Overall	0.055	0.537	0.462	0.002
RMB15:
Population	%missing genotypes	161	163	165	167	169	171	173	175	177	179	181
T4	0	0.05	0	0.41	0	0.024	0.369	0.122	0	0	0.024	0
P6	0	0	0	0.98	0	0.01	0	0	0.01	0	0	0
D6	0	0	0	0.631	0.112	0.089	0.008	0.115	0	0.045	0	0
P2	0	0	0	0.417	0.306	0.083	0.057	0.05	0.05	0.017	0.021	0
P3	0	0.017	0.018	0.271	0.405	0.129	0.113	0	0.018	0.03	0	0
P4	0	0.032	0	0.493	0.1	0.092	0.059	0	0.168	0.056	0	0
P1	0.033	0	0	0.271	0.096	0.286	0.119	0.009	0.198	0.021	0	0
D7	0	0.037	0	0.531	0.075	0.09	0.077	0.02	0.067	0.017	0.086	0
P6	0	0	0	0.535	0.356	0.018	0.054	0.028	0	0.009	0	0
P7	0.038	0	0	0.15	0.021	0.367	0.067	0	0.024	0.011	0.225	0.136
P8	0	0.084	0	0.558	0.151	0.08	0.029	0.014	0.054	0.029	0	0
P9	0.071	0.081	0	0.56	0.19	0	0.084	0.043	0.02	0.023	0	0
Overall	0.011	0.023	0.003	0.479	0.159	0.111	0.076	0.031	0.043	0.027	0.034	0.015
RMB53:
Population	%missing genotypes	202	204	208
T4	0.727	0.904	0.096	0
P6	1	0	0	0
D6	1	0	0	0
P2	1	0	0	0
P3	1	0	0	0
P4	1	0	0	0
P1	0.967	0	0	1
D7	1	0	0	0
P6	1	0	0	0
P7	1	0	0	0
P8	0.632	0.83	0.132	0.038
P9	0.571	0.802	0.154	0.043
Overall	0.937	0.755	0.132	0.113
RM3:
Population	%missing genotypes	223	225	227	229	231	233	235	237	241
T4	0.273	0	0	0	0.328	0.672	0	0	0	0
P6	0.12	0	0	0	0.507	0.482	0.012	0	0	0
D6	0	0	0	0	0.025	0.855	0.12	0	0	0
P2	0.062	0	0	0	0.055	0.848	0.097	0	0	0
P3	0.033	0.052	0.009	0.017	0.049	0.688	0.176	0	0	0.009
P4	0	0	0	0	0.062	0.636	0.25	0.027	0	0.026
P1	0.067	0.025	0	0.009	0.039	0.927	0	0	0	0
D7	0.067	0	0	0	0.04	0.604	0.356	0	0	0
P6	0	0	0	0	0.009	0.857	0.125	0.009	0	0
P7	0	0	0	0.01	0.01	0.221	0.739	0.01	0.01	0
P8	0.212	0	0	0	0.057	0.795	0.148	0	0	0
P9	0.214	0	0	0	0.151	0.689	0.151	0	0	0
Overall	0.07	0.011	0.001	0.005	0.077	0.692	0.205	0.004	0.001	0.003
RCS5:
Population	%missing genotypes	99	103	105	107	109	111	113	115
T4	0.091	0	0.426	0.19	0.283	0.101	0	0	0
P6	0.08	0	0	0	0.023	0.557	0.42	0	0
D6	0.032	0	0.185	0.019	0.281	0.445	0.051	0.019	0
P2	0.25	0	0.101	0	0.2	0.676	0.022	0	0
P3	0	0	0.185	0.026	0.266	0.488	0.033	0	0
P4	0	0	0.13	0.15	0.18	0.513	0	0.027	0
P1	0	0.009	0.38	0	0.391	0.212	0	0.009	0
D7	0	0	0.24	0.048	0.193	0.381	0.029	0	0.109
P6	0	0	0.172	0.036	0.047	0.736	0	0.009	0
P7	0.038	0	0.111	0	0.732	0.136	0.01	0	0.011
P8	0	0	0.438	0.014	0.167	0.314	0.067	0	0
P9	0.143	0	0.518	0.021	0.109	0.301	0.028	0.022	0
Overall	0.041	0.001	0.221	0.04	0.264	0.394	0.057	0.009	0.013
RM27:
Population	%missing genotypes	155	158	161	172	174	175	177
T4	0.091	0.5	0	0	0.5	0	0	0
P6	0.5	0.5	0	0	0.5	0	0	0
D6	0.5	0.5	0	0	0.5	0	0	0
P2	0.453	0.476	0.032	0	0.476	0.016	0	0
P3	0.5	0.5	0	0	0.5	0	0	0
P4	0.5	0.409	0	0.027	0.564	0	0	0
P1	0.5	0.468	0	0.009	0.524	0	0	0
D7	0.5	0.468	0	0.009	0.524	0	0	0
P6	0.483	0.538	0	0	0.462	0	0	0
P7	0.481	0.557	0	0	0.433	0	0.01	0
P8	0.474	0.486	0	0	0.486	0	0	0.028
P9	0.518	0.49	0	0	0.49	0	0	0.02
Overall	0.494	0.496	0.004	0.005	0.485	0.002	0.002	0.005
RCS8:
Population	%missing genotypes	93	97	101	105	107	109	113	117
T4	0	0	0	0.026	0.204	0	0.746	0.024	0
P6	0	0	0	0	0.462	0	0.01	0.528	0
D6	0	0	0	0	0.652	0	0.331	0.017	0
P2	0.062	0	0	0.017	0.693	0	0.196	0.093	0
P3	0	0.009	0	0	0.504	0	0.45	0.037	0
P4	0	0	0.028	0	0.396	0	0.576	0	0
P1	0.033	0	0	0.153	0.417	0	0.393	0.018	0.018
D7	0	0	0	0	0.448	0	0.504	0.048	0
P6	0	0	0	0	0.737	0.034	0.228	0	0
P7	0.038	0	0	0	0.852	0	0.137	0.01	0
P8	0	0.093	0.014	0	0.521	0	0.343	0.028	0
P9	0.071	0.04	0	0.02	0.593	0	0.326	0.021	0
Overall	0.015	0.012	0.003	0.02	0.567	0.005	0.325	0.065	0.003
RC3:
Population	%missing genotypes	172	174	176	178	180	182	184	186	188	190	192	193	195	197	199	205	207
T4	0.182	0	0.368	0	0	0.369	0.032	0	0	0	0	0	0.113	0	0	0	0.117	0
P6	0.04	0	0	0	0	0	0	0.418	0	0	0	0	0	0.011	0	0	0.571	0
D6	0	0	0.032	0.134	0	0.126	0.175	0.02	0.088	0.145	0.154	0	0.02	0	0	0	0.105	0
P2	0.125	0	0.039	0	0	0.139	0.641	0.039	0	0	0	0	0	0.054	0	0	0.067	0.022
P3	0	0	0.036	0.039	0	0.033	0.725	0.01	0	0.008	0.008	0	0	0	0.008	0	0.098	0.034
P4	0	0	0.026	0.026	0.026	0.091	0.736	0	0	0	0	0	0.056	0	0	0	0	0.039
P1	0.067	0	0.103	0	0.063	0	0.514	0.021	0.09	0.021	0	0	0.062	0	0	0	0.01	0.116
D7	0.067	0	0.009	0.019	0	0.228	0.465	0.091	0.092	0.009	0	0	0.009	0.014	0.022	0.01	0.032	0
P6	0.034	0	0.035	0.235	0	0.088	0.229	0.041	0.089	0.066	0.178	0	0.038	0	0	0	0	0
P7	0.077	0.457	0.058	0	0	0.012	0.186	0.252	0	0	0	0	0.035	0	0	0	0	0
P8	0	0	0.092	0.049	0	0.251	0.354	0.05	0.03	0.09	0	0.017	0.017	0.015	0.014	0	0.021	0
P9	0.071	0	0.02	0.072	0.025	0.219	0.369	0.021	0	0.02	0.02	0	0	0.048	0.021	0.029	0.115	0.02
Overall	0.048	0.033	0.063	0.059	0.011	0.102	0.358	0.089	0.042	0.042	0.039	0.002	0.033	0.011	0.008	0.003	0.083	0.022
RM22:
Population	%missing genotypes	259	260	261	262	263	264	265	266	267	268	269	270	271	272	273	274	275
T4	0.455	0.123	0.087	0	0	0	0.087	0	0.249	0	0	0	0	0	0	0.454	0	0
P6	0	1	0	0	0	0	0	0	0	0	0	0	0	0	0	0	0	0
D6	0	0.705	0.009	0	0.019	0	0.008	0	0.14	0.008	0.018	0	0	0.083	0.008	0	0	0
P2	0.125	0.457	0.028	0.315	0.056	0	0.02	0	0.065	0	0.059	0	0	0	0	0	0	0
P3	0	0.405	0	0.01	0.077	0.055	0.102	0.031	0.115	0.075	0.038	0.018	0.055	0	0.009	0.01	0	0
P4	0	0.562	0.05	0	0.05	0	0.168	0	0.027	0.032	0	0.027	0	0	0.027	0.058	0	0
P1	0.033	0.844	0	0.057	0.009	0	0.027	0	0	0.018	0	0	0	0	0	0.037	0	0.009
D7	0.033	0.636	0.03	0.009	0.012	0.023	0.009	0.009	0.047	0.014	0.045	0.009	0.046	0.042	0	0.053	0.009	0.009
P6	0	0.719	0.009	0	0.018	0	0	0	0.147	0	0.064	0.014	0	0.03	0	0	0	0
P7	0.038	0.594	0.038	0	0.042	0.016	0.016	0	0.016	0	0.047	0.029	0.17	0	0.022	0	0	0.011
P8	0.053	0.421	0.054	0	0.155	0	0.073	0	0.02	0.096	0.04	0	0	0.018	0	0.017	0	0.105
P9	0.071	0.548	0.102	0.125	0	0	0.051	0	0	0.025	0.026	0	0.077	0	0.026	0.02	0	0
Overall	0.044	0.641	0.017	0.033	0.034	0.009	0.037	0.005	0.059	0.022	0.033	0.009	0.031	0.018	0.009	0.028	0.001	0.013
Allele counts per locus and per population:
RMB5:
Population	Total number of samples	Missing genotypes	155	157	159	163	165	167	169	171	173	177
T4	11	11	0	0	0	0	0	0	0	0	0	0
P6	25	18	0	0	0	0	28	0	0	0	0	0
D6	31	21	0	0	4	0	36	0	0	0	0	0
P2	16	14	0	0	0	4	0	0	0	0	4	0
P3	30	21	0	0	0	4	16	8	5	1	0	0
P4	10	4	0	0	0	0	18	0	2	0	0	1
P1	30	13	4	4	4	0	27	16	4	1	0	0
D7	30	17	0	0	0	0	34	4	5	5	0	1
P6	29	29	0	0	0	0	0	0	0	0	0	0
P7	26	26	0	0	0	0	0	0	0	0	0	0
P8	19	6	0	0	0	0	13	4	21	1	0	2
P9	14	6	0	4	0	0	15	1	3	1	0	0
Overall	271	186	4	8	8	8	187	33	40	9	4	4
RM26:
Population	Total number of samples	Missing genotypes	186	188	190	191	192	193	194	195	196	197	199	200	201	203
T4	11	0	0	10	0	0	2	0	2	1	11	0	0	6	0	0
P6	25	0	23	1	0	28	0	0	0	0	0	0	0	1	0	0
D6	31	0	4	30	3	2	7	14	7	2	0	11	0	0	0	0
P2	16	2	4	12	3	2	4	6	4	2	1	0	0	0	0	0
P3	30	0	17	35	3	0	9	5	6	4	0	3	0	7	4	0
P4	10	0	1	4	0	0	2	1	2	2	0	2	9	0	1	1
P1	30	4	27	34	0	0	1	5	0	12	0	0	0	7	4	0
D7	30	1	7	6	20	4	11	7	0	3	1	6	8	6	0	0
P6	29	0	6	16	6	0	21	3	15	6	0	15	0	0	0	0
P7	26	1	3	18	5	2	1	3	1	20	1	7	1	0	0	0
P8	19	0	3	7	7	2	7	1	0	6	4	0	2	8	1	0
P9	14	0	6	4	1	0	1	2	1	1	9	1	1	11	0	0
Overall	271	8	101	177	48	40	66	47	38	59	27	45	21	46	10	1
RM12:
Population	Total number of samples	Missing genotypes	211	213	215	217	219	221	223	225	227
T4	11	0	1	0	4	2	23	2	2	0	0
P6	25	2	0	22	23	1	23	0	0	0	0
D6	31	0	0	23	5	3	37	2	3	5	0
P2	16	1	1	9	2	0	29	3	0	0	0
P3	30	0	1	16	9	2	42	10	3	1	0
P4	10	0	0	8	4	1	10	3	0	0	0
P1	30	1	0	15	23	2	29	5	2	1	0
D7	30	0	0	17	13	4	42	5	0	3	0
P6	29	0	1	15	10	2	37	3	0	1	1
P7	26	2	0	15	2	1	23	15	5	5	0
P8	19	0	0	14	6	4	18	5	2	4	0
P9	14	3	0	9	3	1	13	3	2	1	0
Overall	271	9	4	163	104	23	326	56	19	21	1
RCS9:
Population	Total number of samples	Missing genotypes	96	99	102	105	108	111	114	117
T4	11	0	0	5	14	4	4	0	0	0
P6	25	49	0	0	0	25	0	24	2	0
D6	31	39	0	10	36	25	11	1	1	1
P2	16	18	0	7	22	17	0	0	0	0
P3	30	44	0	4	29	31	11	1	0	0
P4	10	16	0	3	5	16	0	0	0	0
P1	30	32	0	6	61	18	0	3	0	0
D7	30	41	2	18	32	23	4	0	0	0
P6	29	40	1	8	33	26	8	0	0	0
P7	26	43	15	10	26	10	0	0	0	0
P8	19	28	0	8	26	14	0	0	0	0
P9	14	28	0	5	15	5	2	1	0	0
Overall	271	395	18	84	299	214	40	30	3	1
RUMR4:
Population	Total number of samples	Missing genotypes	124	126	128
T4	11	0	14	10	0
P6	25	0	34	22	0
D6	31	2	68	16	0
P2	16	8	16	8	0
P3	30	1	29	29	0
P4	10	0	10	10	0
P1	30	1	31	31	0
D7	30	0	32	48	0
P6	29	1	50	33	1
P7	26	2	15	51	0
P8	19	0	19	19	0
P9	14	0	18	12	0
Overall	271	15	336	289	1
RMB15:
Population	Total number of samples	Missing genotypes	161	163	165	167	169	171	173	175	177	179	181
T4	11	0	2	0	9	0	1	11	4	0	0	1	0
P6	25	0	0	0	94	0	1	0	0	1	0	0	0
D6	31	0	0	0	51	10	7	1	8	0	5	0	0
P2	16	0	0	0	13	11	3	3	2	2	1	1	0
P3	30	0	2	2	22	32	11	8	0	2	3	0	0
P4	10	0	1	0	10	4	3	2	0	5	2	0	0
P1	30	1	0	0	21	9	21	8	1	11	2	0	0
D7	30	0	4	0	40	6	7	6	2	5	2	7	0
P6	29	0	0	0	40	29	2	6	3	0	1	0	0
P7	26	1	0	0	12	2	22	6	0	2	1	16	11
P8	19	0	5	0	29	9	4	2	1	3	2	0	0
P9	14	1	3	0	14	6	0	3	2	1	1	0	0
Overall	271	3	17	2	355	118	82	56	23	32	20	25	11
RMB53:
Population	Total number of samples	Missing genotypes	202	204	208
T4	11	8	9	1	0
P6	25	25	0	0	0
D6	31	31	0	0	0
P2	16	16	0	0	0
P3	30	30	0	0	0
P4	10	10	0	0	0
P1	30	29	0	0	4
D7	30	30	0	0	0
P6	29	29	0	0	0
P7	26	26	0	0	0
P8	19	12	16	3	1
P9	14	8	15	3	1
Overall	271	254	40	7	6
RM3:
Population	Total number of samples	Missing genotypes	223	225	227	229	231	233	235	237	241
T4	11	3	0	0	0	8	16	0	0	0	0
P6	25	3	0	0	0	21	21	1	0	0	0
D6	31	0	0	0	0	3	84	13	0	0	0
P2	16	1	0	0	0	3	36	5	0	0	0
P3	30	1	6	1	2	5	60	14	0	0	1
P4	10	0	0	0	0	2	15	6	1	0	1
P1	30	2	2	0	1	3	99	0	0	0	0
D7	30	2	0	0	0	4	47	27	0	0	0
P6	29	0	0	0	0	1	74	12	1	0	0
P7	26	0	0	0	1	1	20	65	1	1	0
P8	19	4	0	0	0	3	28	7	0	0	0
P9	14	3	0	0	0	4	21	4	0	0	0
Overall	271	19	8	1	4	58	524	154	3	1	2
RCS5:
Population	Total number of samples	Missing genotypes	99	103	105	107	109	111	113	115
T4	11	1	0	11	7	7	3	0	0	0
P6	25	2	0	0	0	2	23	21	0	0
D6	31	1	0	13	2	20	36	5	2	0
P2	16	4	0	4	0	8	17	1	0	0
P3	30	0	0	16	3	25	36	4	0	0
P4	10	0	0	4	6	5	19	0	1	0
P1	30	0	1	30	0	31	19	0	1	0
D7	30	0	0	18	5	14	27	3	0	8
P6	29	0	0	15	3	4	59	0	1	0
P7	26	1	0	8	0	55	10	1	0	1
P8	19	0	0	20	1	10	13	4	0	0
P9	14	2	0	15	1	3	12	1	1	0
Overall	271	11	1	154	28	184	274	40	6	9
RM27:
Population	Total number of samples	Missing genotypes	155	158	161	172	174	175	177
T4	11	1	10	0	0	10	0	0	0
P6	25	0	25	0	0	25	0	0	0
D6	31	0	31	0	0	31	0	0	0
P2	16	0	16	2	0	16	1	0	0
P3	30	0	30	0	0	30	0	0	0
P4	10	0	9	0	1	10	0	0	0
P1	30	0	29	0	1	30	0	0	0
D7	30	0	29	0	1	30	0	0	0
P6	29	0	32	0	0	28	0	0	0
P7	26	0	29	0	0	24	0	1	0
P8	19	0	19	0	0	19	0	0	2
P9	14	1	13	0	0	13	0	0	1
Overall	271	2	272	2	3	266	1	1	3
RCS8:
Population	Total number of samples	Missing genotypes	93	97	101	105	107	109	113	117
T4	11	0	0	0	1	6	0	22	1	0
P6	25	0	0	0	0	24	0	1	25	0
D6	31	0	0	0	0	57	0	29	2	0
P2	16	1	0	0	1	38	0	10	5	0
P3	30	0	1	0	0	45	0	38	4	0
P4	10	0	0	1	0	10	0	17	0	0
P1	30	1	0	0	12	28	0	27	2	2
D7	30	0	0	0	0	37	0	36	5	0
P6	29	0	0	0	0	65	4	21	0	0
P7	26	1	0	0	0	64	0	11	1	0
P8	19	0	6	1	0	25	0	19	2	0
P9	14	1	2	0	1	21	0	10	1	0
Overall	271	4	9	2	15	420	4	241	48	2
RC3:
Population	Total number of samples	Missing genotypes	172	174	176	178	180	182	184	186	188	190	192	193	195	197	199	205	207
T4	11	2	0	8	0	0	6	1	0	0	0	0	0	3	0	0	0	3	0
P6	25	1	0	0	0	0	0	0	22	0	0	0	0	0	1	0	0	27	0
D6	31	0	0	4	10	0	8	12	2	8	15	9	0	2	0	0	0	6	0
P2	16	2	0	2	0	0	4	23	2	0	0	0	0	0	2	0	0	2	1
P3	30	0	0	4	3	0	4	64	1	0	1	1	0	0	0	1	0	8	3
P4	10	0	0	1	1	1	2	18	0	0	0	0	0	2	0	0	0	0	1
P1	30	2	0	6	0	5	0	36	2	6	2	0	0	6	0	0	0	1	8
D7	30	2	0	1	2	0	18	31	6	6	1	0	0	1	1	2	1	2	0
P6	29	1	0	3	18	0	7	13	3	5	4	14	0	3	0	0	0	0	0
P7	26	2	21	5	0	0	1	10	15	0	0	0	0	3	0	0	0	0	0
P8	19	0	0	5	2	0	8	11	3	2	3	0	1	1	1	1	0	1	0
P9	14	1	0	1	2	1	7	10	1	0	1	1	0	0	2	1	1	3	1
Overall	271	13	21	40	38	7	65	229	57	27	27	25	1	21	7	5	2	53	14
RM22:
Population	Total number of samples	Missing genotypes	259	260	261	262	263	264	265	266	267	268	269	270	271	272	273	274	275
T4	11	5	2	1	0	0	0	1	0	3	0	0	0	0	0	0	7	0	0
P6	25	0	100	0	0	0	0	0	0	0	0	0	0	0	0	0	0	0	0
D6	31	0	62	1	0	2	0	1	0	10	1	2	0	0	8	1	0	0	0
P2	16	2	22	1	14	2	0	1	0	2	0	2	0	0	0	0	0	0	0
P3	30	0	25	0	1	4	4	10	3	9	6	4	2	4	0	1	1	0	0
P4	10	0	13	1	0	1	0	5	0	1	1	0	1	0	0	1	2	0	0
P1	30	1	68	0	6	1	0	3	0	0	2	0	0	0	0	0	4	0	2
D7	30	1	55	2	1	1	2	1	1	3	1	4	1	4	3	0	5	1	1
P6	29	0	58	1	0	2	0	0	0	15	0	7	1	0	2	0	0	0	0
P7	26	1	35	2	0	4	1	1	0	1	0	3	2	12	0	3	0	0	1
P8	19	1	26	2	0	9	0	3	0	1	5	2	0	0	1	0	1	0	6
P9	14	1	23	2	3	0	0	2	0	0	1	1	0	4	0	1	1	0	0
Overall	271	12	489	13	25	26	7	28	4	45	17	25	7	24	14	7	21	1	10

## Sheet: Allele freqs R. maritima
GenoDive 3.03
Allele Frequencies and Allele Counts R. maritima
total number of alleles for each locus
RMV22	2
RMV56	1
RMB5	2
RMB55	1
RMB15	1
RMV10	1
RMB34	2
RMB12	1
RMV20	1
RMB16	1
Total: 13
Allele frequencies per locus and per population:
RMV22:
Population	% missing genotypes	91	92
D1	0	0.875	0.125
D5	0.095	1	0
D4	0.067	0	1
D2	0	0	1
D3	0	0.174	0.826
Overall	0.034	0.435	0.565
RMV56:
Population	% missing genotypes	131
D1	0	1
D5	0	1
D4	0	1
D2	0	1
D3	0	1
Overall	0	1
RMB5:
Population	% missing genotypes	159	161
D1	0	1	0
D5	0	1	0
D4	0	0.2	0.8
D2	0	1	0
D3	0.077	1	0
Overall	0.011	0.862	0.138
RMB55:
Population	% missing genotypes	194
D1	0	1
D5	0.048	1
D4	0.2	1
D2	0.077	1
D3	0.13	1
Overall	0.091	1
RMB15:
Population	% missing genotypes	167
D1	0	1
D5	0	1
D4	0	1
D2	0	1
D3	0	1
Overall	0	1
RMV10:
Population	% missing genotypes	113
D1	0	1
D5	0	1
D4	0	1
D2	0	1
D3	0	1
Overall	0	1
RMB34:
Population	% missing genotypes	123	125
D1	0.125	1	0
D5	0	1	0
D4	0	0	1
D2	0	0	1
D3	0	0	1
Overall	0.023	0.407	0.593
RMB12:
Population	% missing genotypes	168
D1	0	1
D5	0	1
D4	0.133	1
D2	0	1
D3	0.043	1
Overall	0.034	1
RMV20:
Population	% missing genotypes	81
D1	0	1
D5	0.095	1
D4	0.467	1
D2	0.077	1
D3	0.087	1
Overall	0.136	1
RMB16:
Population	% missing genotypes	151
D1	0	1
D5	0.048	1
D4	0.267	1
D2	0.077	1
D3	0.087	1
Overall	0.091	1
Allele counts per locus and per population:
RMV22:
Population	total number of samples	Missing genotypes	91	92
D1	16	0	28	4
D5	21	2	38	0
D4	15	1	0	28
D2	13	0	0	26
D3	23	0	8	38
Overall	88	3	74	96
RMV56:
Population	total number of samples	Missing genotypes	131
D1	16	0	32
D5	21	0	42
D4	15	0	30
D2	13	0	26
D3	23	0	46
Overall	88	0	176
RMB5:
Population	total number of samples	Missing genotypes	159	161
D1	16	0	32	0
D5	21	0	42	0
D4	15	0	6	24
D2	13	1	24	0
D3	23	0	46	0
Overall	88	1	150	24
RMB55:
Population	total number of samples	Missing genotypes	194
D1	16	0	32
D5	21	1	40
D4	15	3	24
D2	13	1	24
D3	23	3	40
Overall	88	8	160
RMB15:
Population	total number of samples	Missing genotypes	167
D1	16	0	32
D5	21	0	42
D4	15	0	30
D2	13	0	26
D3	23	0	46
Overall	88	0	176
RMV10:
Population	total number of samples	Missing genotypes	113
D1	16	0	32
D5	21	0	42
D4	15	0	30
D2	13	0	26
D3	23	0	46
Overall	88	0	176
RMB34:
Population	total number of samples	Missing genotypes	123	125
D1	16	2	28	0
D5	21	0	42	0
D4	15	0	0	30
D2	13	0	0	26
D3	23	0	0	46
Overall	88	2	70	102
RMB12:
Population	total number of samples	Missing genotypes	168
D1	16	0	32
D5	21	0	42
D4	15	2	26
D2	13	0	26
D3	23	1	44
Overall	88	3	170
RMV20:
Population	total number of samples	Missing genotypes	81
D1	16	0	32
D5	21	2	38
D4	15	7	16
D2	13	1	24
D3	23	2	42
Overall	88	12	152
RMB16:
Population	total number of samples	Missing genotypes	151
D1	16	0	32
D5	21	1	40
D4	15	4	22
D2	13	1	24
D3	23	2	42
Overall	88	8	160

## Sheet: Allele freqs hybrids RM multipl
GenoDive 3.03
Allele Frequencies and Allele Counts R. maritima
total number of alleles for each locus
RMV22	4
RMV56	4
RMB5	3
RMB55	13
RMB15	6
RMV10	7
RMB34	5
RMB12	7
RMV20	8
RMB16	5
Total: 62
- Allele frequencies per locus and per population:
Maximum likelihood method was used to correct for the unknown dosage of the alleles.
RMV22:
Population	% missing genotypes	91	92	93	94
T1	0	0.676	0	0.29	0.033
D1b	0	0.393	0.357	0	0.25
T2	0.045	0.152	0.797	0.013	0.038
T3	0	0	1	0	0
Overall	0.013	0.222	0.673	0.058	0.047
RMV56:
Population	% missing genotypes	125	127	129	131
T1	1	0	0	0	0
D1b	1	0	0	0	0
T2	0.045	0.065	0.082	0.853	0
T3	0	0	0.106	0.884	0.01
Overall	0.4103	0.0434783	0.170455	0.631437	0.0237704
RMB5:
Population	% missing genotypes	157	159	161
T1	0	0	0.94	0.06
D1b	0.045	0	1	0
T2	0	0.198	0	0.802
T3	0	0	0	1
Overall	0.013	0.064	0.372	0.564
RMB55:
Population	% missing genotypes	185	187	188	190	191	192	193	194	196	197	199	200	202
T1	0	0.015	0.103	0	0.049	0.063	0	0.015	0.694	0.015	0.015	0	0.015	0.015
D1b	0	0	0	0.071	0	0.143	0.179	0	0.571	0	0	0	0.036	0
T2	0	0.741	0.013	0	0	0.055	0	0	0.165	0	0.014	0.012	0	0
T3	0	1	0	0	0	0	0	0	0	0	0	0	0	0
Overall	0	0.479	0.041	0.012	0.018	0.071	0.03	0.006	0.302	0.006	0.012	0.006	0.012	0.006
RMB15:
Population	% missing genotypes	165	167	169	171	173	175
T1	0	0	0	0	0	1	0
D1b	0	0.179	0.643	0.107	0	0	0.071
T2	0	0	0	0	0.099	0.901	0
T3	0	0	0	0	0	1	0
Overall	0	0.03	0.107	0.018	0.024	0.81	0.012
RMV10:
Population	% missing genotypes	104	107	110	113	116	119	122
T1	0	0.038	0.132	0.019	0.195	0.211	0.27	0.137
D1b	0	0.036	0.036	0.107	0.5	0.036	0	0.286
T2	0	0.114	0.062	0.025	0.763	0	0.037	0
T3	0	0	0	0.01	0.99	0	0	0
Overall	0	0.05	0.062	0.044	0.656	0.044	0.056	0.087
RMB34:
Population	% missing genotypes	123	125	127	129	133
T1	0.722	0.2	0	0.2	0.4	0.2
D1b	0.462	0	0	1	0	0
T2	0.091	0.091	0.533	0.35	0	0.026
T3	0	0	0.5	0.5	0	0
Overall	0.269	0.065	0.355	0.468	0.065	0.048
RMB12:
Population	% missing genotypes	160	162	168	170	172	178	180
T1	0.444	0.5	0.473	0.027	0	0	0	0
D1b	1	0	0	0	0	0	0	0
T2	0.318	0	0	0	0.133	0.4	0.467	0
T3	0.04	0	0	0	0	0.821	0.096	0.083
Overall	0.372	0.172414	0.146552	0.00862069	0.0344828	0.439655	0.163793	0.0344828
RMV20:
Population	% missing genotypes	75	81	83	87	89	90	91	93
T1	0	0	0.28	0.079	0.439	0.02	0.146	0.02	0.015
D1b	0.077	0	0.962	0	0	0	0	0.038	0
T2	0	0.025	0.84	0.057	0.062	0.018	0	0	0
T3	0.08	0	1	0	0	0	0	0	0
Overall	0.038	0.012	0.722	0.031	0.148	0.012	0.056	0.012	0.006
RMB16:
Population	% missing genotypes	151	153	157	159	161
T1	0.333	0.254	0.5	0.052	0.169	0.024
D1b	0.308	0.4	0.45	0	0.05	0.1
T2	0.318	0	1	0	0	0
T3	0.08	0	1	0	0	0
Overall	0.244	0.117	0.797	0.016	0.047	0.023
- Allele counts per locus and per population:
RMV22:
Population	total number of samples	missing genotypes	91	92	93	94
T1	18	0	34	0	14	2
D1b	13	0	11	10	0	7
T2	22	1	12	63	1	3
T3	25	0	0	100	0	0
Overall	78	1	57	173	15	12
		1
RMV56:
Population	total number of samples	missing genotypes	125	127	129	131
T1	18	18	0	0	0	0
D1b	13	13	0	0	0	0
T2	22	1	4	6	32	0
T3	25	0	0	9	40	1
Overall	78	32	4	15	72	29
RMB5:
Population	total number of samples	missing genotypes	157	159	161
T1	18	0	0	34	4
D1b	13	1	0	24	0
T2	22	0	10	0	34
T3	25	0	0	0	50
Overall	78	1	10	58	88
RMB55:
Population	total number of samples	missing genotypes	185	187	188	190	191	192	193	194	196	197	199	200	202
T1	18	0	1	6	0	3	4	0	1	25	1	1	0	1	1
D1b	13	0	0	0	2	0	4	5	0	16	0	0	0	1	0
T2	22	0	30	1	0	0	4	0	0	10	0	1	1	0	0
T3	25	0	50	0	0	0	0	0	0	0	0	0	0	0	0
Overall	78	0	81	7	2	3	12	5	1	51	1	2	1	2	1
RMB15:
Population	total number of samples	missing genotypes	165	167	169	171	173	175
T1	18	0	0	0	0	0	46	0
D1b	13	0	5	18	3	0	0	2
T2	22	0	0	0	0	4	40	0
T3	25	0	0	0	0	0	50	0
Overall	78	0	5	18	3	4	136	2
RMV10:
Population	total number of samples	missing genotypes	104	107	110	113	116	119	122
T1	18	0	2	6	1	10	6	7	6
D1b	13	0	1	1	3	14	1	0	8
T2	22	0	5	3	2	32	0	2	0
T3	25	0	0	0	1	49	0	0	0
Overall	78	0	8	10	7	105	7	9	14
RMB34:
Population	total number of samples	missing genotypes	123	125	127	129	133
T1	18	13	4	0	4	8	4
D1b	13	6	0	0	14	0	0
T2	22	2	4	19	15	0	2
T3	25	0	0	25	25	0	0
Overall	78	21	8	44	58	8	6
RMB12:
Population	total number of samples	missing genotypes	160	162	168	170	172	178	180
T1	18	8	20	17	1	0	0	0	0
D1b	13	3	3	0	19	0	0	0	0
T2	22	7	0	0	0	4	12	14	0
T3	25	1	0	0	0	0	39	5	4
Overall	78	19	23	17	20	4	51	19	4
RMV20:
Population	total number of samples	missing genotypes	75	81	83	87	89	90	91	93
T1	18	0	0	12	2	20	1	9	1	1
D1b	13	1	0	25	0	0	0	0	1	0
T2	22	0	2	34	3	4	1	0	0	0
T3	25	2	0	46	0	0	0	0	0	0
Overall	78	3	2	117	5	24	2	9	2	1
RMB16:
Population	total number of samples	missing genotypes	151	153	157	159	161
T1	18	6	7	17	2	5	1
D1b	13	4	8	9	0	1	2
T2	22	7	0	30	0	0	0
T3	25	2	0	46	0	0	0
Overall	78	19	15	102	2	6	3

## Sheet: Allele freqs hybrids RS multipl
GenoDive 3.03
Allele Frequencies and Allele Counts R. maritima
total number of alleles for each locus
RMB5	3
RM26	6
RM12	3
RCS9	3
RUMR4	6
RMB15	6
RMB53	2
RM3	3
RCS5	12
RM27	7
RCS8	6
RC3	7
RM22	0
Total: 64
- Allele frequencies per locus and per population:
Maximum likelihood method was used to correct for the unknown dosage of the alleles.
RMB5:
Population	% missing genotypes	157	159	161
T1	0	0	0.939	0.061
T2	0.111	0.25	0	0.75
T3	0.4	0.056	0.833	0.111
D1b	0.071	0	0.538	0.462
Overall	0.154	0.086	0.607	0.307
RM26:
Population	% missing genotypes	186	187	188	194	196	197
T1	0.97	0	0	0.5	0	0.5	0
T2	1	0	0	0	0	0	0
T3	0.367	0.043	0.105	0	0.799	0	0.053
D1b	1	0	0	0	0	0	0
Overall	0.808	0.042	0.111	0.014	0.764	0.014	0.056
RM12:
Population	% missing genotypes	219	223	225
T1	0.515	0.008	0.522	0.47
T2	0.148	0	0.5	0.5
T3	1	0	0	0
D1b	0	0	0.5	0.5
Overall	0.337	0.007	0.5	0.493
RCS9:
Population	% missing genotypes	99	102	105
T1	0.97	0	0.5	0.5
T2	1	0	0	0
T3	0.333	0	0.5	0.5
D1b	0.071	1	0	0
Overall	0.673	0.382	0.309	0.309
RUMR4:
Population	% missing genotypes	124	126	131	133	135	137
T1	0.182	0	0	0	0	0.222	0.778
T2	0.148	0	0	0	0.011	0	0.989
T3	0.367	0	0	1	0	0	0
D1b	0.071	0.462	0.038	0	0	0	0.5
Overall	0.212	0.046	0.004	0.145	0.004	0.092	0.71
RMB15:
Population	% missing genotypes	165	167	169	171	173	175
T1	0	0	0	0	0	1	0
T2	0.111	0	0.021	0.021	0.25	0.708	0
T3	0.267	0.078	0.715	0.013	0.046	0.134	0.013
D1b	0.071	0	1	0	0	0	0
Overall	0.115	0.018	0.252	0.006	0.085	0.635	0.003
RMB53:
Population	% missing genotypes	208	210
T1	0	0	1
T2	0	0	1
T3	0.067	0.059	0.941
D1b	0	0	1
Overall	0.019	0.013	0.988
RM3:
Population	% missing genotypes	221	223	231
T1	0.091	0.967	0	0.033
T2	0.148	1	0	0
T3	1	0	0	0
D1b	0.071	0	1	0
Overall	0.365	0.874	0.109	0.017
RCS5:
Population	% missing genotypes	93	95	99	101	103	105	109	113	121	125	127	129
T1	0.97	0	0	0	0	0.5	0	0.5	0	0	0	0	0
T2	0.963	0	1	0	0	0	0	0	0	0	0	0	0
T3	0.267	0.034	0.034	0.034	0.023	0	0	0.013	0.356	0.053	0.356	0.069	0.026
D1b	0.929	0	0	0	0	0	1	0	0	0	0	0	0
Overall	0.76	0.045	0.106	0.045	0.03	0.015	0.03	0.03	0.258	0.061	0.258	0.091	0.03
RM27:
Population	% missing genotypes	143	149	151	153	155	161	168
T1	0	0	0	0	0	0.534	0.466	0
T2	0.148	0	0	0	0	0.5	0.5	0
T3	0.333	0.423	0.027	0.29	0.027	0	0	0.234
D1b	0.071	0	0	0	0	0	1	0
Overall	0.144	0.103	0.01	0.088	0.01	0.294	0.418	0.077
RCS8:
Population	% missing genotypes	10	83	101	105	109	111
T1	0.03	0	0	0.262	0.73	0.008	0
T2	0.148	0	0	0.989	0.011	0	0
T3	0.567	0	1	0	0	0	0
D1b	0.071	0.038	0	0.923	0	0	0.038
Overall	0.221	0.003	0.177	0.5	0.313	0.003	0.003
RC3:
Population	% missing genotypes	166	171	173	175	180	209	210
T1	0.273	0	0	0.623	0.021	0.021	0.302	0.034
T2	0.185	0	0.037	0.342	0	0	0.621	0
T3	0.567	1	0	0	0	0	0	0
D1b	0.929	0	0	0	0	1	0	0
Overall	0.423	0.342	0.02	0.309	0.007	0.02	0.283	0.02
RM22:
Population	% missing genotypes
T1	1
T2	1
T3	1
D1b	1
Overall	1
- Allele counts per locus and per population:
RMB5:
Population	Total number of samples	Missing genotypes	157	159	161
T1	33	0	0	124	8
T2	27	3	24	0	72
T3	30	12	4	60	8
D1b	14	1	0	14	12
Overall	104	16	28	198	100
RM26:
Population	Total number of samples	Missing genotypes	186	187	188	194	196	197
T1	33	32	0	0	1	0	1	0
T2	27	27	0	0	0	0	0	0
T3	30	11	3	8	0	55	0	4
D1b	14	14	0	0	0	0	0	0
Overall	104	84	3	8	1	55	1	4
RM12:
Population	Total number of samples	Missing genotypes	219	223	225
T1	33	1	1	32	31
T2	27	4	0	23	23
T3	30	30	0	0	0
D1b	14	0	0	14	14
Overall	104	35	1	69	68
RCS9:
Population	Total number of samples	Missing genotypes	99	102	105
T1	33	32	0	1	1
T2	27	27	0	0	0
T3	30	10	0	20	20
D1b	14	1	26	0	0
Overall	104	70	26	21	21
RUMR4:
Population	Total number of samples	Missing genotypes	124	126	131	133	135	137
T1	33	6	0	0	0	0	24	84
T2	27	4	0	0	0	1	0	89
T3	30	11	0	0	38	0	0	0
D1b	14	1	12	1	0	0	0	13
Overall	104	22	12	1	38	1	24	186
RMB15:
Population	Total number of samples	Missing genotypes	165	167	169	171	173	175
T1	33	0	0	0	0	0	132	0
T2	27	3	0	1	1	24	68	0
T3	30	8	6	56	1	4	9	1
D1b	14	1	0	26	0	0	0	0
Overall	104	12	6	83	2	28	209	1
RMB53:
Population	Total number of samples	Missing genotypes	208	210
T1	33	0	0	132
T2	27	0	0	92
T3	30	2	4	64
D1b	14	0	0	28
Overall	104	2	4	316
RM3:
Population	Total number of samples	Missing genotypes	221	223	231
T1	33	3	116	0	4
T2	27	4	92	0	0
T3	30	30	0	0	0
D1b	14	1	0	26	0
Overall	104	38	208	26	4
RCS5:
Population	Total number of samples	Missing genotypes	93	95	99	101	103	105	109	113	121	125	127	129
T1	33	32	0	0	0	0	1	0	1	0	0	0	0	0
T2	27	26	0	4	0	0	0	0	0	0	0	0	0	0
T3	30	8	3	3	3	2	0	0	1	17	4	17	6	2
D1b	14	13	0	0	0	0	0	2	0	0	0	0	0	0
Overall	104	79	3	7	3	2	1	2	2	17	4	17	6	2
RM27:
Population	Total number of samples	Missing genotypes	143	149	151	153	155	161	168
T1	33	0	0	0	0	0	34	32	0
T2	27	4	0	0	0	0	23	23	0
T3	30	10	20	2	17	2	0	0	15
D1b	14	1	0	0	0	0	0	26	0
Overall	104	15	20	2	17	2	57	81	15
RCS8:
Population	Total number of samples	Missing genotypes	10	83	101	105	109	111
T1	33	1	0	0	33	90	1	0
T2	27	4	0	0	90	2	0	0
T3	30	17	0	52	0	0	0	0
D1b	14	1	1	0	24	0	0	1
Overall	104	23	1	52	147	92	1	1
RC3:
Population	Total number of samples	Missing genotypes	166	171	173	175	180	209	210
T1	33	9	0	0	29	1	1	18	3
T2	27	5	0	3	18	0	0	25	0
T3	30	17	52	0	0	0	0	0	0
D1b	14	13	0	0	0	0	2	0	0
Overall	104	44	52	3	47	1	3	43	3
RM22:
Population	Total number of samples	Missing genotypes
T1	33	33
T2	27	27
T3	30	30
D1b	14	14
Overall	104	104
___________________________________________________________________
